# Supplementary material for: Methylene-Blue-Encapsulated Liposomes as Photodynamic Therapy Nano Agents for Breast Cancer Cells
Source: PubMed Central journal article supplement (PMC6359461; doi:10.3390/nano9010014), 2018-12-23
Supplement: nanomaterials-09-00014-s001.pdf [file nanomaterials-09-00014-s001.pdf]

1 Article

2 **Methylene-Blue-Encapsulated Liposomes as**  
3 **Photodynamic Therapy Nano Agents for Breast**  
4 **Cancer Cells**

5 **Po-Ting Wu, Chih-Ling Lin, Che-Wei Lin, Ning-Chu Chang, Wei-Bor Tsai \* and Jiashing Yu \***

6 Department of Chemical Engineering, National Taiwan University, Taipei 103, Taiwan;

7 r05524112@ntu.edu.tw (P.-T.W.); r06524045@ntu.edu.tw (C.-L.L.); d01642002@ntu.edu.tw (C.-W.L.);

8 r05524045@ntu.edu.tw (N.-C.C.)

9 \* Correspondence: weibortsai@ntu.edu.tw (W.-B.T.); jiayu@ntu.edu.tw (J.Y.); Tel.: +886-2-3366-9477 (J. Y.)

10 Received: 17 November 2018; Accepted: 18 December 2018; Published: date

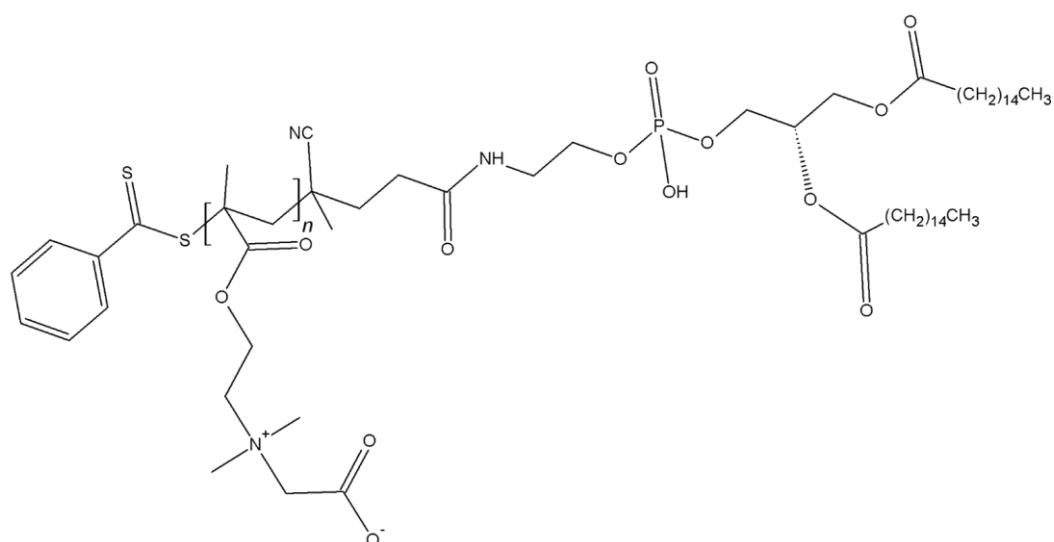

11

12

**Figure S1.** Structure of DPPE-PCB.

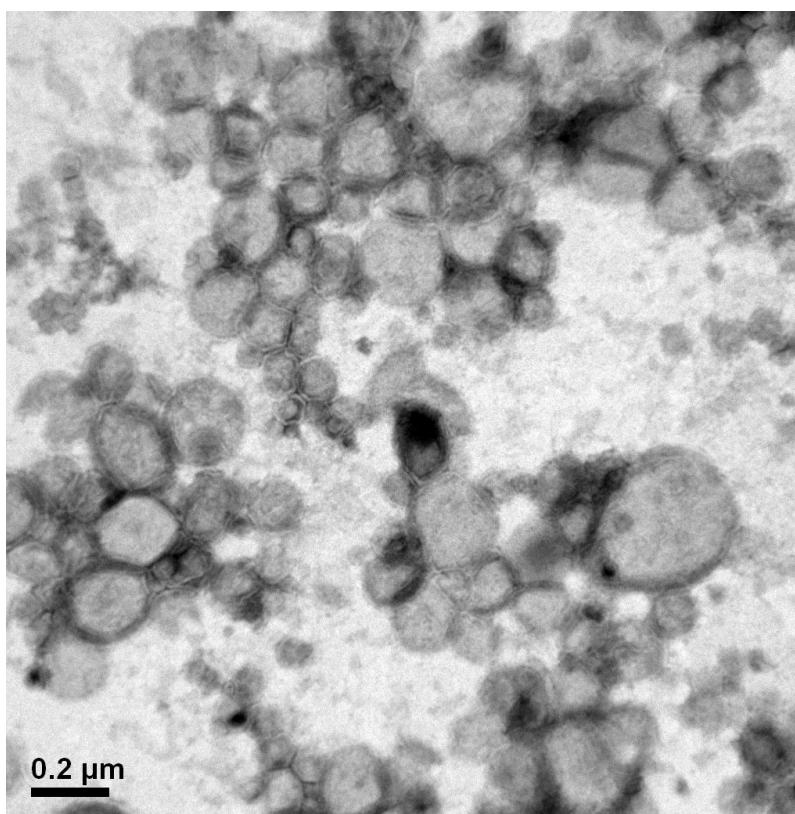

13

14

Figure S2. TEM image of MB-liposomes in a larger view.

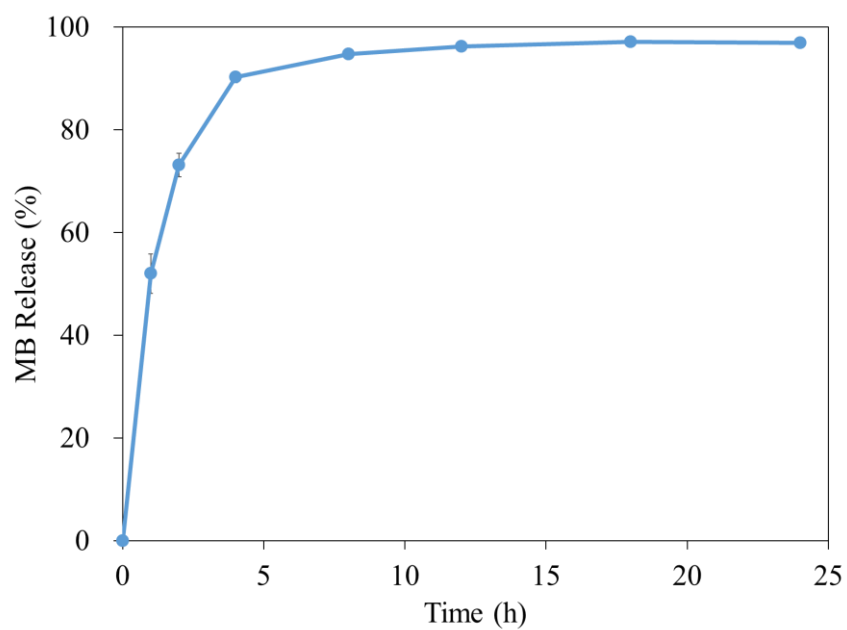

15

16

Figure S3. MB release profile. (n=3)

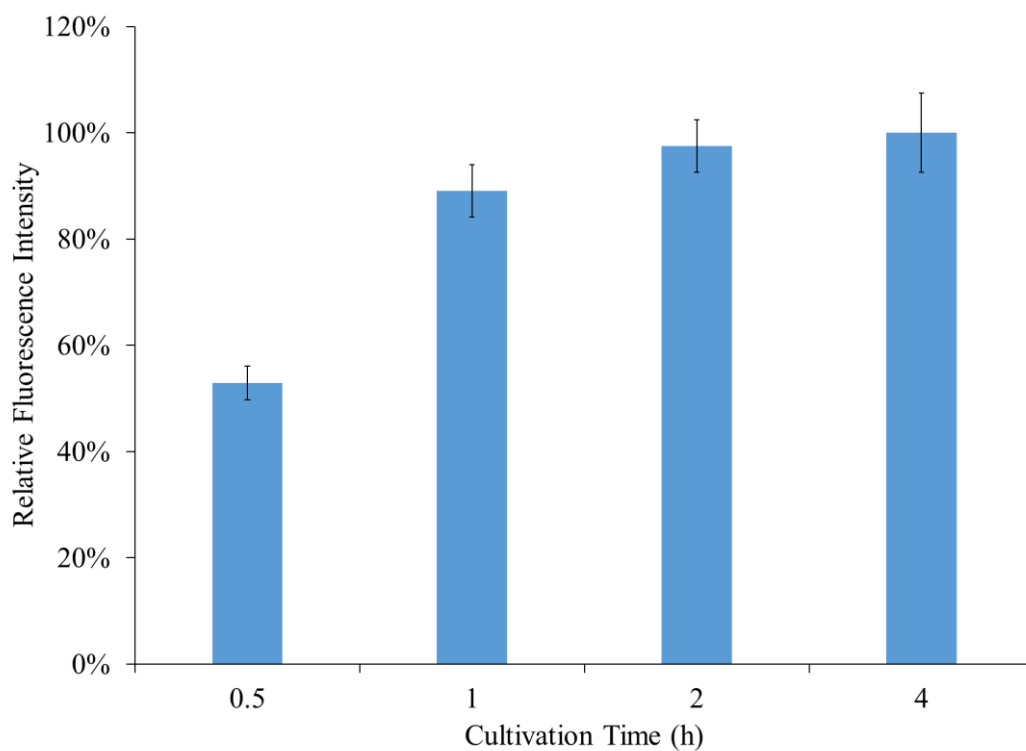

17

18

Figure S4. Relative DiI fluorescence intensity to different culture time. (n=3)

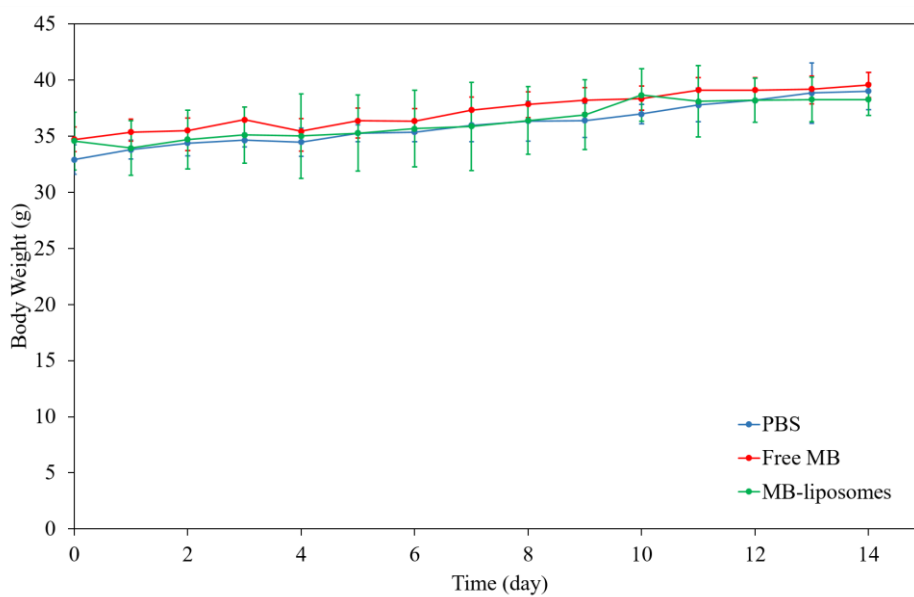

19

20

21

Figure S5. Mice body weights of post-injection in 14 days. (N=3)

22

**Table S1.** Average diameter and PdI of stability profile.

| <b>Time (h)</b> | <b>Time (day)</b> | <b>Average diameter (nm)</b> | <b>Standard deviation (nm)</b> | <b>PdI</b> |
|-----------------|-------------------|------------------------------|--------------------------------|------------|
| 0               | 0                 | 164.2                        | 3.02                           | 0.174      |
| 17              | 0.708             | 165.9                        | 7.28                           | 0.170      |
| 41              | 1.708             | 165.0                        | 3.25                           | 0.167      |
| 66              | 2.750             | 165.5                        | 4.78                           | 0.141      |
| 138             | 5.750             | 160.9                        | 1.39                           | 0.114      |
| 163             | 6.792             | 161.7                        | 2.05                           | 0.136      |
| 185             | 7.708             | 162.2                        | 1.35                           | 0.138      |
| 235             | 9.792             | 161.6                        | 1.07                           | 0.111      |
| 310             | 12.917            | 162.4                        | 1.63                           | 0.131      |
| 336             | 14.000            | 167.3                        | 6.32                           | 0.151      |

23

24
